RETRACTION

## Retraction: High CASC expression predicts poor prognosis of lung cancer: A systematic review with meta-analysis

The *PLOS One* Editors

The *PLOS One* Editors retract this article [1] because it was identified as one of a series of submissions for which we have concerns about potential manipulation of the publication process. These concerns call into question the validity and provenance of the reported results. We regret that the issues were not identified prior to the article's publication.

HHan, HHuang, YT, XH, and CC did not agree with the retraction. APC either did not respond directly or could not be reached.

### Reference

1. Han H, Huang H, Chen A-p, Tang Y, Huang X, Chen C. RETRACTED: High CASC expression predicts poor prognosis of lung cancer: A systematic review with meta-analysis. *PLoS One*. 2024;19(4):e0292726. <https://doi.org/10.1371/journal.pone.0292726> PMID: [38573879](https://pubmed.ncbi.nlm.nih.gov/38573879/)

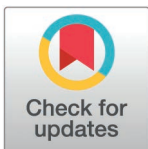

### OPEN ACCESS

**Citation:** The *PLOS One* Editors (2026) Retraction: High CASC expression predicts poor prognosis of lung cancer: A systematic review with meta-analysis. *PLoS One* 21(4): e0348041. <https://doi.org/10.1371/journal.pone.0348041>

**Published:** April 28, 2026

**Copyright:** © 2026 The *PLOS One* Editors. This is an open access article distributed under the terms of the [Creative Commons Attribution License](https://creativecommons.org/licenses/by/4.0/), which permits unrestricted use, distribution, and reproduction in any medium, provided the original author and source are credited.
